# Supplementary material for: 3D molecular network and magnetic ordering, formed by multi-dentate magnetic couplers, bis(benzene)chromium(i) and [1,2,5]thiadiazolo[3,4-c][1,2,5]thiadiazolidyl
Source: Royal Society of Chemistry journal article supplement (doi:10.1039/c8dt02214c), 2018-01-01
Supplement: c8dt02214c1.pdf [file c8dt02214c1.pdf]

## Supplementary information

# 3D Molecular Network and Magnetic Ordering, Formed by Multi-Dentate Magnetic Couplers of Bis(benzene)chromium(I) and [1,2,5]Thiadiazolo [3,4-*c*][1,2,5]thiadiazolidyl

Yoshiaki Shuku,<sup>a</sup> Yuta Hirai,<sup>a</sup> Nikolay A. Semenov,<sup>b</sup> Evgeny Kadilenko,<sup>c,d</sup> Nina P. Gritsan,<sup>c,d</sup> Andrey V. Zibarev,<sup>b,d</sup> Oleg A. Rakitin,<sup>e</sup> Kunio Awaga<sup>a\*</sup>

<sup>a</sup> Department of Chemistry and IRCCS, Nagoya University, Furo-cho, Chikusa-ku, Nagoya 464-8602, Japan. E-mail: awaga@mbox.chem.nagoya-u.ac.jp

<sup>b</sup> Institute of Organic Chemistry, and <sup>c</sup> Institute of Chemical Kinetics and Combustion, Siberian Branch of the Russian Academy of Sciences, 630090 Novosibirsk, Russia

<sup>d</sup> Department of Physics, Novosibirsk State University, 630090 Novosibirsk, Russia

<sup>e</sup> N.D. Zelinsky Institute of Organic Chemistry Russian Academy of Sciences, 119991, Moscow, Russia

**Table S1** Selected bond lengths for TDTD, Cr(C<sub>6</sub>H<sub>6</sub>)<sub>2</sub> and [Cr(C<sub>6</sub>H<sub>6</sub>)<sub>2</sub>][TDTD].

| Selected bond lengths for TDTD / Å                                            |                                                              |                                                                       |
|-------------------------------------------------------------------------------|--------------------------------------------------------------|-----------------------------------------------------------------------|
|                                                                               | TDTD <sup>a</sup>                                            | [Cr(C <sub>6</sub> H <sub>6</sub> ) <sub>2</sub> ][TDTD] <sup>b</sup> |
| S-N                                                                           | 1.619(2)                                                     | 1.6587(16)                                                            |
|                                                                               | 1.619(2)                                                     | 1.6661(19)                                                            |
| N-C                                                                           | 1.351(3)                                                     | 1.341(2)                                                              |
|                                                                               | 1.348(3)                                                     | 1.343(2)                                                              |
| C-C                                                                           | 1.429(4)                                                     | 1.449(3)                                                              |
| Selected bond lengths for Cr(C <sub>6</sub> H <sub>6</sub> ) <sub>2</sub> / Å |                                                              |                                                                       |
|                                                                               | Cr(C <sub>6</sub> H <sub>6</sub> ) <sub>2</sub> <sup>c</sup> | [Cr(C <sub>6</sub> H <sub>6</sub> ) <sub>2</sub> ][TDTD] <sup>b</sup> |
| Cr-C                                                                          | 2.143(2)                                                     | 2.1515(19)                                                            |
|                                                                               | 2.140(2)                                                     | 2.1517(18)                                                            |
|                                                                               |                                                              | 2.1336(18)                                                            |
|                                                                               |                                                              | 2.1418(18)                                                            |
|                                                                               |                                                              | 2.1528(18)                                                            |
|                                                                               |                                                              | 2.154(2)                                                              |
| C-C                                                                           | 1.417(3)                                                     | 1.420(3)                                                              |
|                                                                               | 1.416(3)                                                     | 1.413(2)                                                              |
|                                                                               |                                                              | 1.418(2)                                                              |
|                                                                               |                                                              | 1.414(3)                                                              |
|                                                                               |                                                              | 1.419(2)                                                              |
|                                                                               |                                                              | 1.412(2)                                                              |

<sup>a</sup>Ref 12. <sup>b</sup>This work. <sup>c</sup>Ref 15.

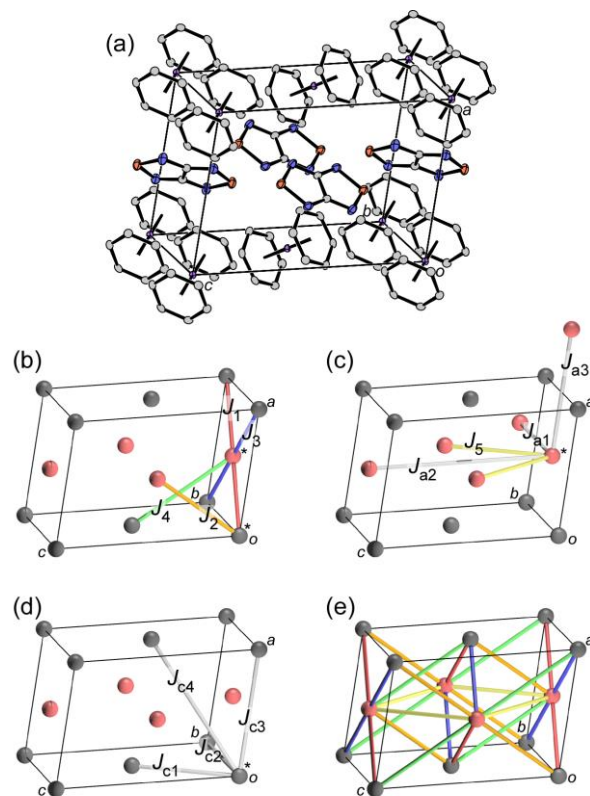

**Fig. S1** Molecular packing (a) and its magnetic interactions  $J$  (b-e): Magnetic interactions between  $[\text{Cr}(\text{C}_6\text{H}_6)_2]^+$  and  $[\text{TDTD}]^-$  (b),  $[\text{TDTD}]^-$  and  $[\text{TDTD}]^-$  (c), and  $[\text{Cr}(\text{C}_6\text{H}_6)_2]^+$  and  $[\text{Cr}(\text{C}_6\text{H}_6)_2]^+$  (d) around asterisked molecules. Effective magnetic interactions in a unit cell (e). Gray and red spheres indicates the positions of  $[\text{Cr}(\text{C}_6\text{H}_6)_2]^+$  and  $[\text{TDTD}]^-$ . Red, orange, blue, green, yellow and gray lines indicate the representative magnetic interactions  $J_1$ ,  $J_2$ ,  $J_3$ ,  $J_4$  and  $J_5$ , and negligibly small interactions, respectively. Calculated  $J$  values are listed in Table S2.

**Table S2** Intermolecular magnetic coupling constants  $J$  in the crystal structure of  $[\text{Cr}(\text{C}_6\text{H}_6)][\text{TDTD}]$  calculated by DFT, CASSCF and NEVPT2 procedures.

|                                                                                      | Chain | Directions           | $J / \text{cm}^{-1}$ |           |           |
|--------------------------------------------------------------------------------------|-------|----------------------|----------------------|-----------|-----------|
|                                                                                      |       |                      | DFT                  | CASSCF    | NEVPT2    |
| $[\text{Cr}(\text{C}_6\text{H}_6)_2]^+ \cdots [\text{TDTD}]^-$                       |       |                      |                      |           |           |
| $J_1$ (red)                                                                          | C     | $[110], [1\bar{1}0]$ |                      | $-3.60^c$ | $-8.96^e$ |
| $J_2$ (orange)                                                                       | B     | $[101]$              |                      | $1.68^c$  | $1.70^e$  |
| $J_3$ (blue)                                                                         | A     | $[110], [1\bar{1}0]$ |                      | $0.06^c$  | $-0.30^e$ |
| $J_4$ (green)                                                                        |       | $[10\bar{1}]$        |                      | $0.59^c$  | $-1.44^e$ |
| $[\text{TDTD}]^- \cdots [\text{TDTD}]^-$                                             |       |                      |                      |           |           |
| $J_5$ (yellow)                                                                       |       | $[011], [01\bar{1}]$ | $-3.09^a$            | $0.29^d$  | $-1.16^e$ |
| $J_{a1}$                                                                             |       | $[010]$              | $0.00^a$             |           |           |
| $J_{a2}$                                                                             |       | $[001]$              | $0.00^a$             |           |           |
| $J_{a3}$                                                                             |       | $[100]$              | $0.00^a$             |           |           |
| $[\text{Cr}(\text{C}_6\text{H}_6)_2]^+ \cdots [\text{Cr}(\text{C}_6\text{H}_6)_2]^+$ |       |                      |                      |           |           |
| $J_{c1}$                                                                             |       | $[011]$              | $-0.05^b$            |           |           |
| $J_{c2}$                                                                             |       | $[010]$              | $-0.07^b$            |           |           |
| $J_{c3}$                                                                             |       | $[100]$              | $0.11^b$             |           |           |
| $J_{c4}$                                                                             |       | $[211]$              | $0.02^b$             |           |           |

Level of theory and basis sets:

<sup>a</sup>BS-UB3LYP/TZVP, <sup>b</sup>FS-B3LYP/TZVP, <sup>c</sup>SA-CASSCF(16,13)/TZVP,

<sup>d</sup>SA-CASSCF(14,14)/TZVP, <sup>e</sup>SA-CASSCF(14,14)/NEVPT2/TZVP

The exchange interactions for pairs  $[\text{Cr}(\text{C}_6\text{H}_6)_2]^+ \cdots [\text{TDTD}]^-$  predicted using the BS-DFT approach were unreasonably strong (thousands of  $\text{cm}^{-1}$ ). This effect is due to the incorrect wavefunction of the BS-singlet state of these pairs corresponding to the significant back charge transfer from  $[\text{TDTD}]^-$  to  $[\text{Cr}(\text{C}_6\text{H}_6)_2]^+$ .
